# Supplementary material
Source: PubMed Central journal article supplement (PMC4559699)
Supplement: SD4.pdf [file SD4.pdf]

## SUPPLEMENTAL APPENDIX 1

### COX PROPORTIONAL HAZARDS MODEL INTERPRETATION

The Cox proportional hazards (PH) model yields a regression coefficient  $\beta$ , for which the exponential ( $e^\beta$ ) expresses a hazard ratio of a given covariate to the hazard of a predetermined comparative group. For main effects of categorical covariates,  $e^\beta$  represents the hazard of the given categorical covariate to the hazard of the group designated as the comparative group, in this case, the control treatment

group, at fixed values of all other covariates. When  $e^\beta$  is larger than 1, it means that the given variable has a hazard  $e^\beta$  times higher than the comparative group hazard. When the hazard ratio is between 0 and 1, it means that its hazard is smaller than the comparative group, reduced by  $1 - e^\beta$ .

For main effects of discrete variables,  $e^\beta$  represents the hazard at 1 unit of a given variable to the hazard at 0 units, with all other covariates fixed. For interaction effects, the  $\beta$  value given for the interaction must first be subtracted from or added to the main effects  $\beta$  before taking the exponent, which represents the hazard at 1 unit below or above the mean for the categorical covariate in question.

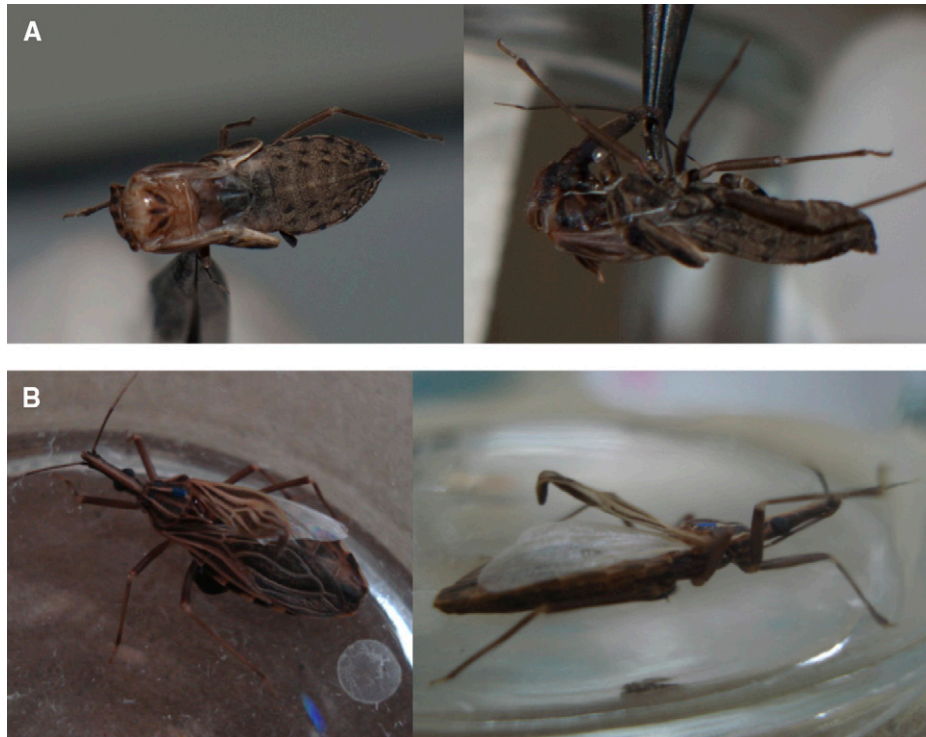

SUPPLEMENTAL FIGURE 1. Photos of insects that experienced molting problems. (A) *Rhodnius prolixus* individual with head and thorax doubled over from an unsuccessful attempt to molt from the 5th instar to the adult stage, resulting in death. Top view (left) and side view (right). (B) *R. prolixus* individual with incomplete wing expansion after molting to the adult stage. Image credit: JK Peterson.

SUPPLEMENTAL TABLE 1  
Cox model output

| Variable              |       | Regression coefficient ( $\beta$ ) | Hazard ratio $e^\beta$ | Standard error of $\beta$ | P value    | 95% CI for hazard ratio |       |
|-----------------------|-------|------------------------------------|------------------------|---------------------------|------------|-------------------------|-------|
|                       |       |                                    |                        |                           |            | Lower                   | Upper |
| Cas15                 | Early | 1.825                              | 6.206                  | 0.894                     | 0.041*     | 1.075                   | 35.82 |
|                       | Late  | 1.729                              | 5.637                  | 0.489                     | 4.0e-04*** | 2.162                   | 14.69 |
| Cas20                 | Early | 1.919                              | 6.814                  | 0.910                     | 0.035*     | 1.144                   | 40.57 |
|                       | Late  | 0.754                              | 2.125                  | 0.648                     | 0.244      | 0.596                   | 7.576 |
| Gal61                 | Early | 1.421                              | 4.141                  | 0.921                     | 0.122      | 0.681                   | 25.18 |
|                       | Late  | 0.682                              | 1.979                  | 0.486                     | 0.160      | 0.763                   | 5.134 |
| SO-8                  | Early | 1.699                              | 5.472                  | 0.918                     | 0.064°     | 0.905                   | 33.08 |
|                       | Late  | 0.769                              | 2.159                  | 0.604                     | 0.202      | 0.660                   | 7.055 |
| Sebas1                | Early | -0.359                             | 0.697                  | 1.024                     | 0.725      | 0.093                   | 5.192 |
|                       | Late  | -1.686                             | 0.185                  | 1.073                     | 0.116      | 0.022                   | 1.517 |
| Blood-weight          |       | -2.004                             | 0.134                  | 0.639                     | 0.001**    | 0.038                   | 0.471 |
| Gal61E: Blood-weight  |       | 1.547                              | 4.701                  | 0.807                     | 0.055      | 0.966                   | 22.87 |
| Cas20E: Blood-weight  |       | 2.036                              | 7.664                  | 0.756                     | 0.007**    | 1.741                   | 33.73 |
| SO-8E: Blood-weight   |       | 0.756                              | 2.129                  | 0.769                     | 0.325      | 0.471                   | 9.618 |
| Cas15E: Blood-weight  |       | 1.391                              | 4.020                  | 0.786                     | 0.076°     | 0.861                   | 18.76 |
| Episode: Blood-weight |       | 2.959                              | 19.28                  | 0.708                     | 2.9e-05*** | 4.806                   | 77.38 |

CI = confidence interval. "Early" and "late" represent before and after 28 days postinfection. Episode represents the two periods examined, described above. Episode: blood-weight hazard is significantly high due to no deaths in the control group in episode 0. P value notation: °P < 0.1; \*P < 0.05; \*\*P < 0.01; \*\*\*P < 0.001.
